# Supplementary material for: Early Postnatal Oxygen Exposure Predicts Choroidal Thinning in Neonates
Source: PubMed Central journal article supplement — Invest Ophthalmol Vis Sci. 2021 Jul 16;62(9):23. doi: 10.1167/iovs.62.9.23 (PMC8297422; doi:10.1167/iovs.62.9.23), 2021-07-16
Supplement: iovs-62-9-23_s001.pdf [file iovs-62-9-23_s001.pdf]

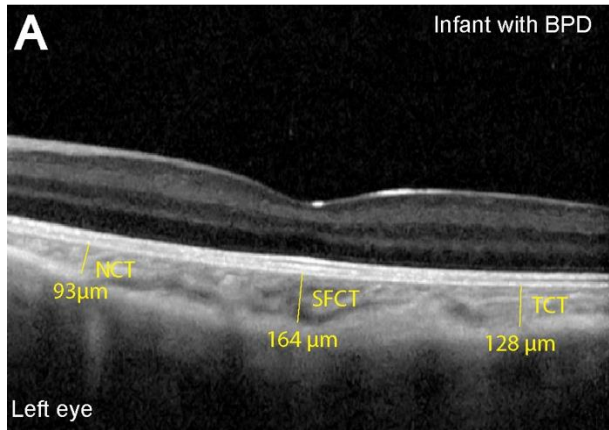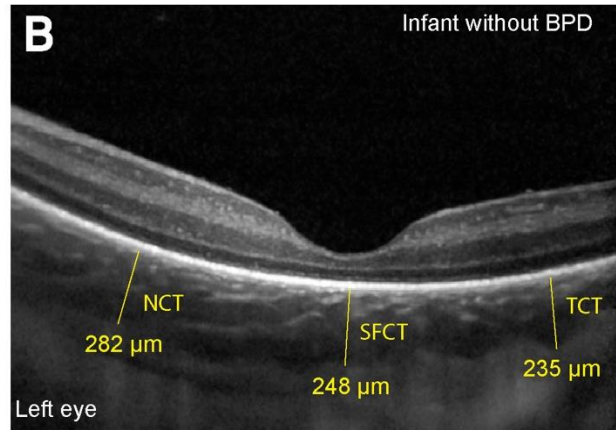

**Supplemental Figure S1.** Infants had significantly sub-foveal choroidal thickness (SFCT) and nasal choroidal thickness (NCT), when compared to infants without BPD. A-B. Additional representative foveal B-scan of infants with/without BPD
