# Supplementary material for: Early Postnatal Oxygen Exposure Predicts Choroidal Thinning in Neonates
Source: PubMed Central journal article supplement — Invest Ophthalmol Vis Sci. 2021 Jul 16;62(9):23. doi: 10.1167/iovs.62.9.23 (PMC8297422; doi:10.1167/iovs.62.9.23), 2021-07-16
Supplement: iovs-62-9-23_s002.pdf [file iovs-62-9-23_s002.pdf]

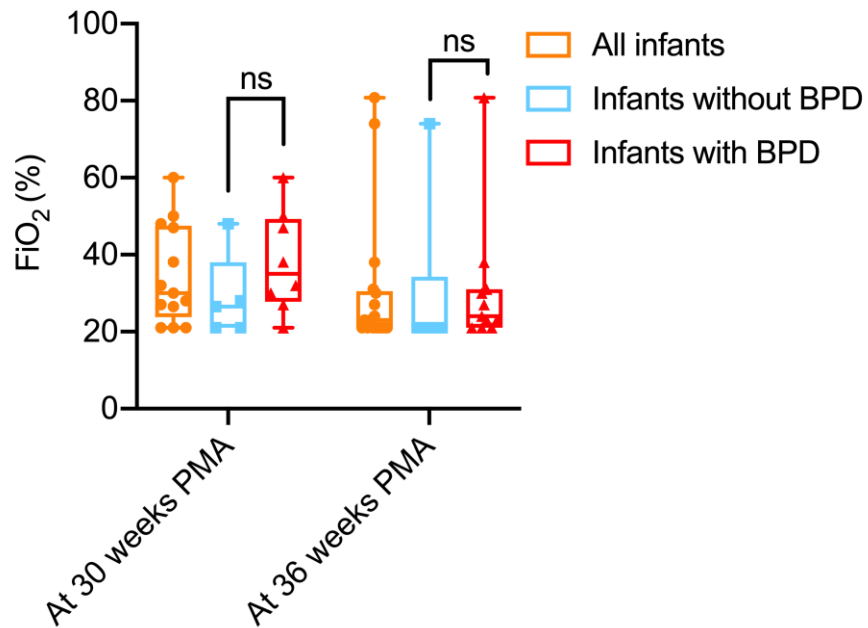

**Supplemental Figure S2.**

Variability of  $\text{FiO}_2$  at the 30 and 36 weeks, in all infants (orange circles), infants without BPD (blue squares), and infants with BPD (red triangles). Box plot lines represent the median and interquartile ranges, and error bars represent maximum and minimums. There was no statistically significant difference in  $\text{FiO}_2$  at 30 weeks or 36 weeks PMA between infants with or without BPD.
